# Supplementary material
Source: PubMed Central journal article supplement (PMC7484464)
Supplement: NIHMS1609152-supplement-1.pdf [file NIHMS1609152-supplement-1.pdf]

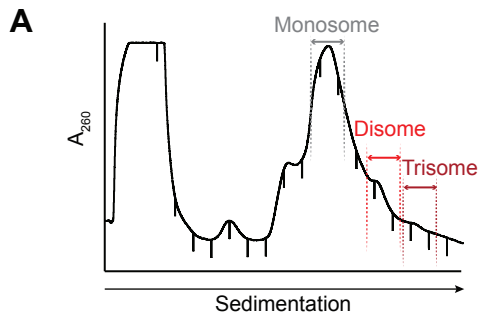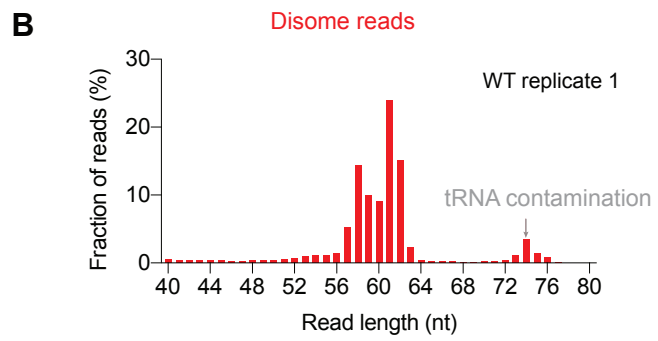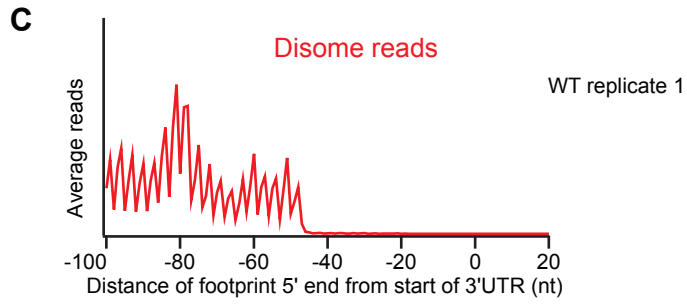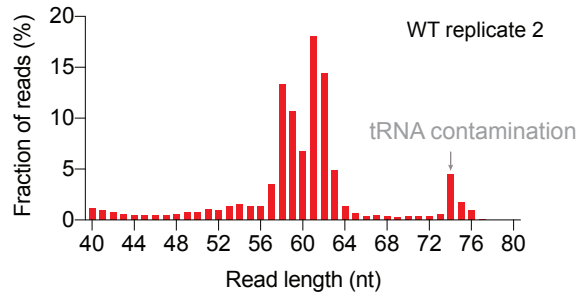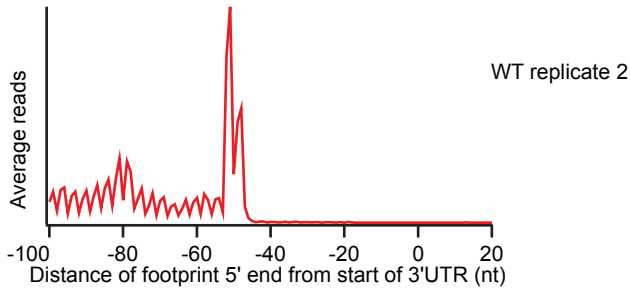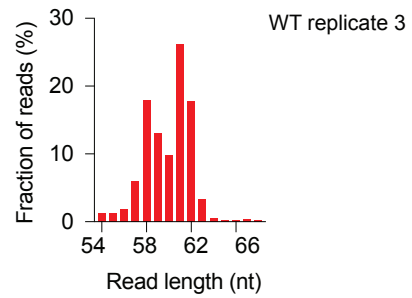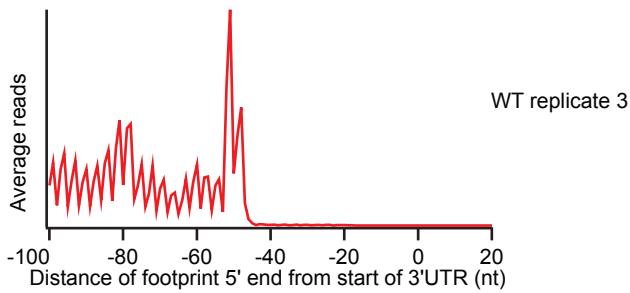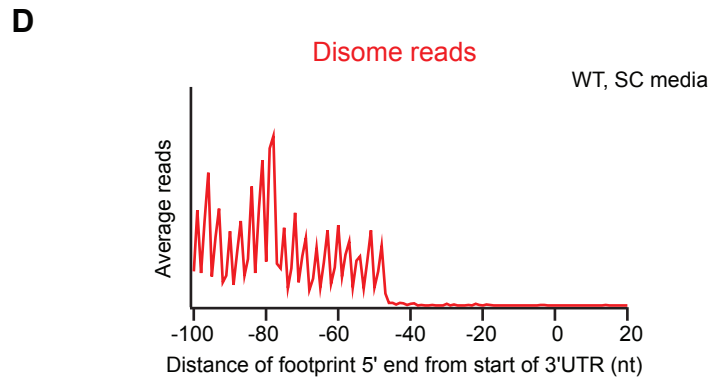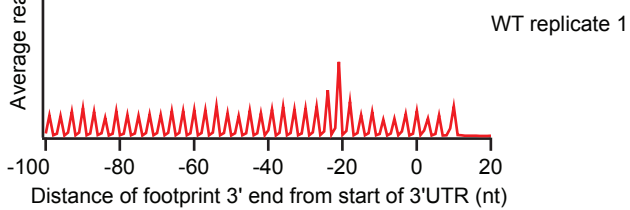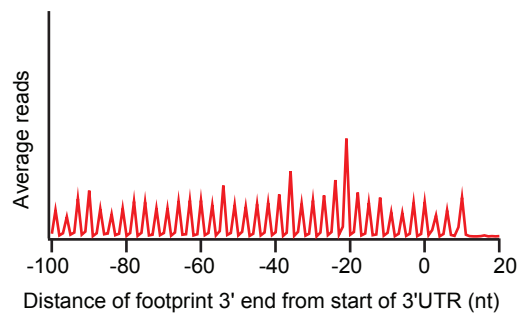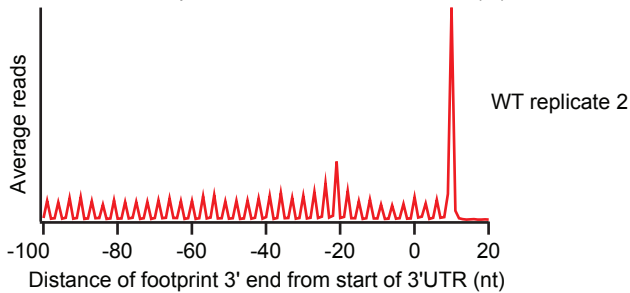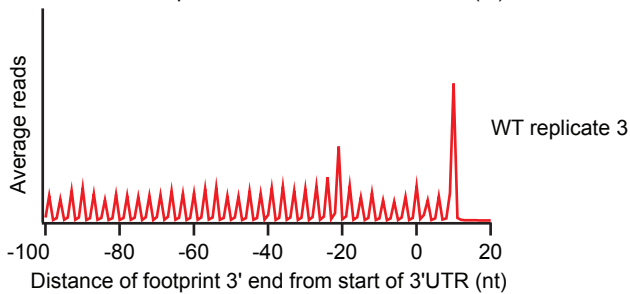

**Figure S1: Read length distribution and metagene analysis of disome profiling replicates. Related to Figure 1.**

**A.** An example sucrose gradient from RNase I digested WT yeast lysate. The fractions that were collected for monosome, disome and trisome profiling are indicated by dashed lines.

**B.** Length distribution of three replicates of disome profiling reads that are mapped to coding regions and splice junctions. Data obtained from WT cells. In all replicates, two distinct peaks at 58 and 61 nt are reproducibly observed. Note that in replicates 2 and 3, 40-80 nt mRNAs were selected during size selection, but only reads between 57 and 63 nt were used for later analysis. A peak that appears between 73-75 nt corresponds to tRNA contamination and is indicated by a gray arrow.

**C.** Average disome rpm mapped to ORFs that are aligned by their stop codons. Both 5' end (top) and 3' end (bottom) alignments of the footprints obtained from three replicates of WT cells are shown. Note that the presence of a stop codon peak is variable between different replicates.

**D.** Average disome rpm as in **C** for WT His3<sup>+</sup> cells grown in SC-His media are shown. The trisome profiling (Figure 1) was also performed in this strain. Note that the data obtained from cells grown in SC-His media does not substantially differ from those grown in YPD media (compare this trace to replicate 1 in **C**). In addition, growth media does not have any effect on the read length distribution (See Figure S2B, left panel).

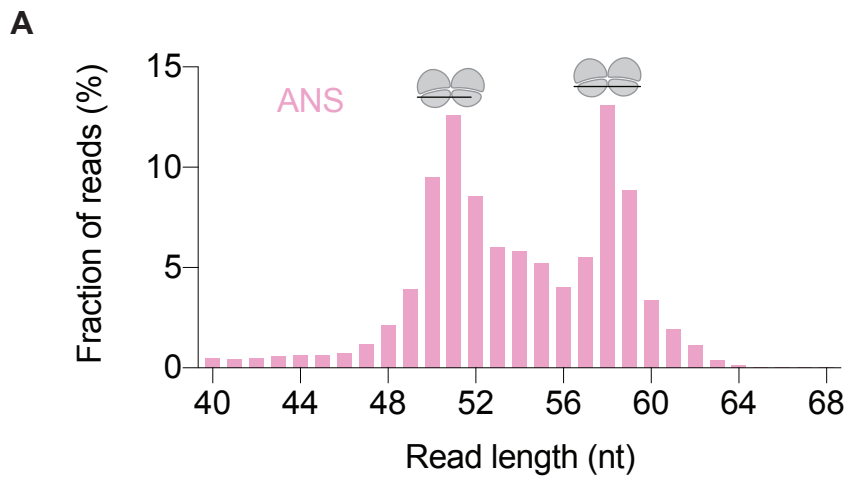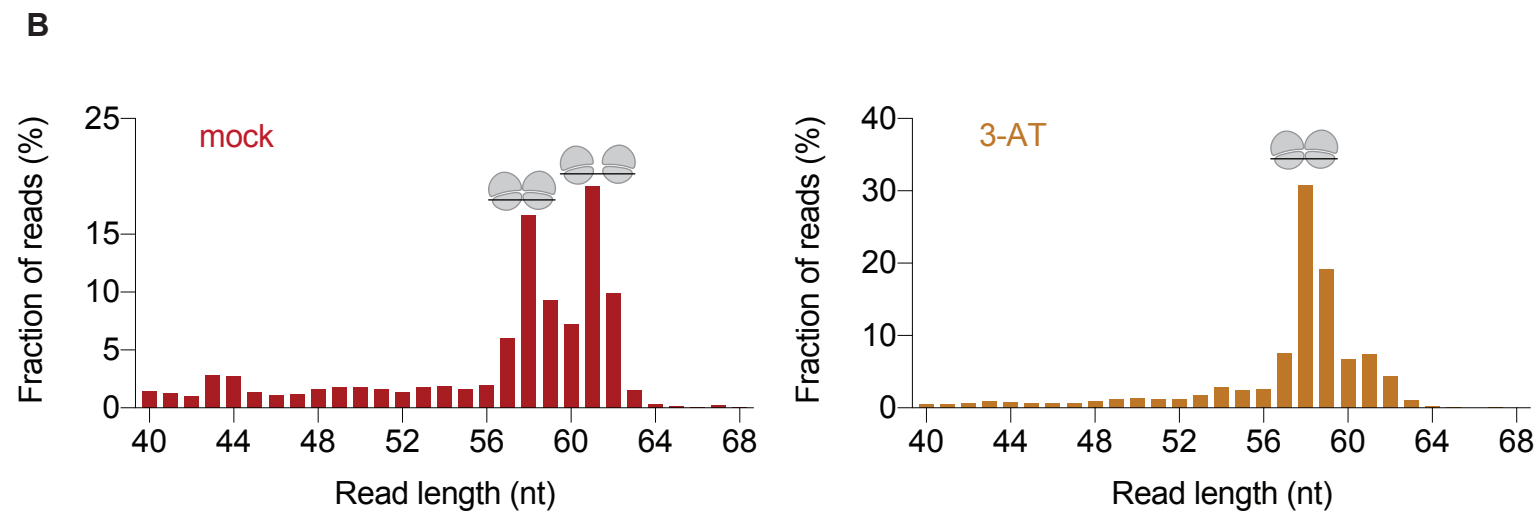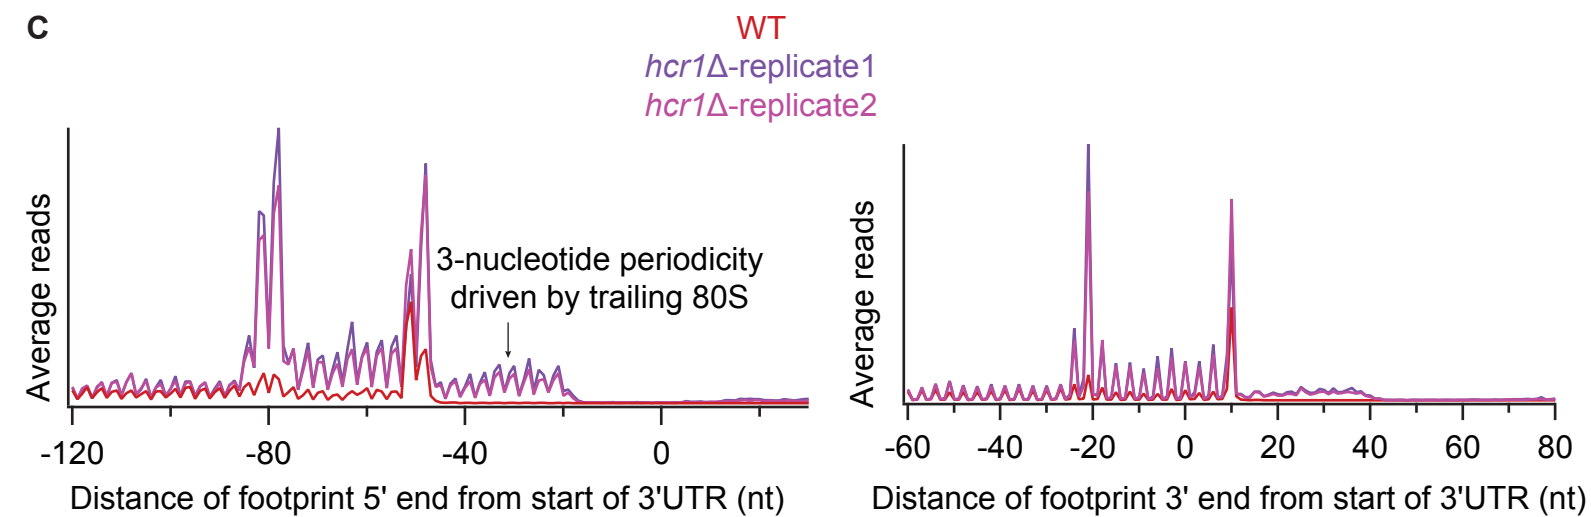

**Figure S2: Disome footprint size and distribution in response to various cellular stress conditions. Related to Figure 2.**

**A.** Length distribution of disome profiling reads mapped to the coding regions and splice junctions, obtained from WT cells treated with 50  $\mu\text{g}/\text{mL}$  ANS for 30 minutes prior to harvesting. Disome footprints between 40-68 nt were selected for these experiments. Note that ANS-treated cells have a distinct disome peak at 51 nt and 58 nt, presumably corresponding to compact disomes with an either open or occupied A-site, respectively.

**B.** Length distribution of disome profiling reads mapped to coding regions and splice junctions, obtained from mock treated cells (left) or the cells treated with 45 mM 3-AT for 30 minutes prior to harvesting. The disome footprints between 40-68 nt were selected for these experiments but we only used footprints in the range of 57-63 nt for computational analysis. 3-AT treated cells have a distinct disome peak at 58 nt, whereas the 61 nt peak is strongly diminished, consistent with a compact disome structure.

**C.** Average disome rpm mapped to ORFs that are aligned by their stop codons in WT (red) and *hcr1* $\Delta$  (purple) cells. 5' end (left) and 3' end (right) alignments of the footprints are shown. The 5' end alignment shows strong periodicity for the scanning disome peaks. Two biological replicates of *hcr1* $\Delta$  are shown in shades of purple.



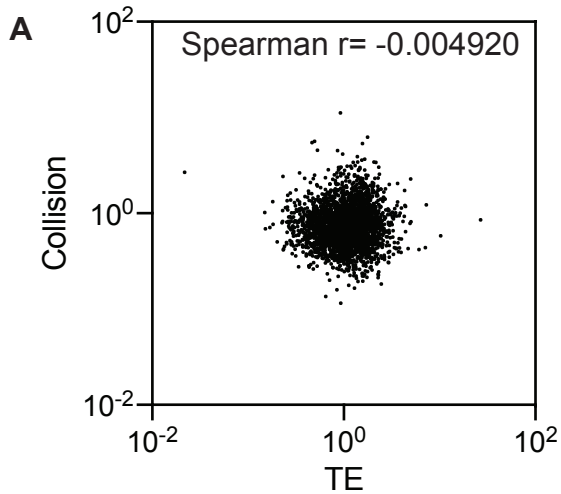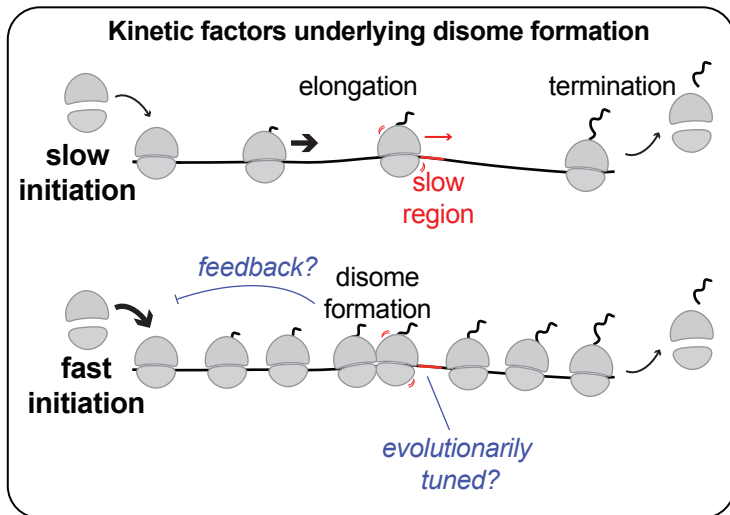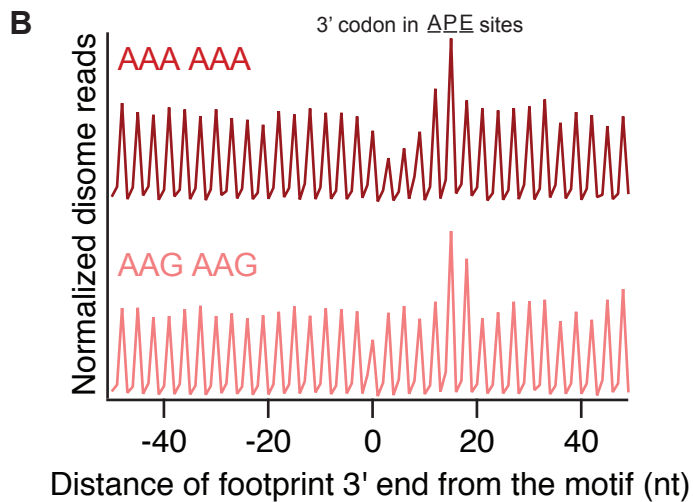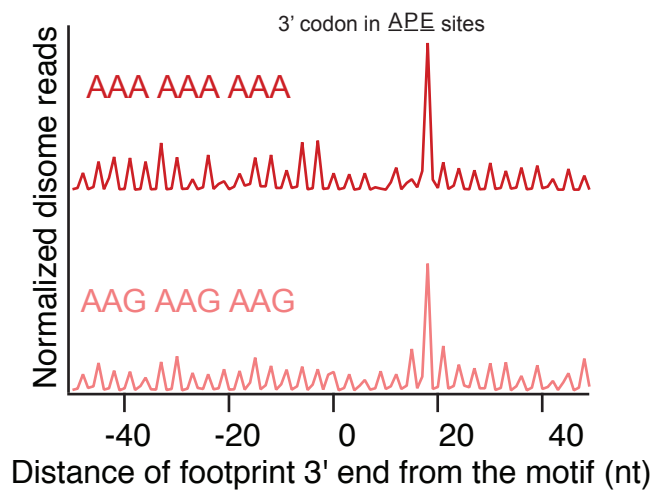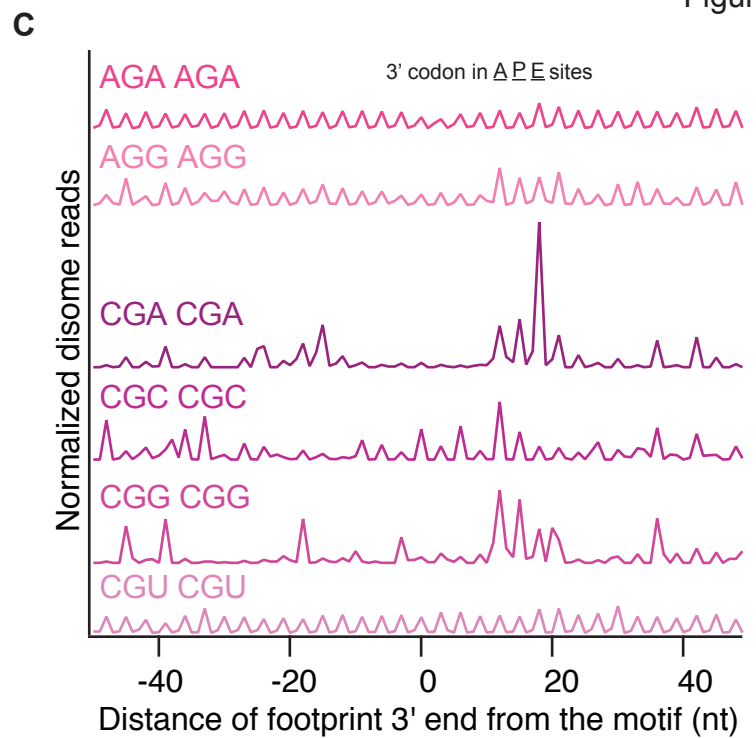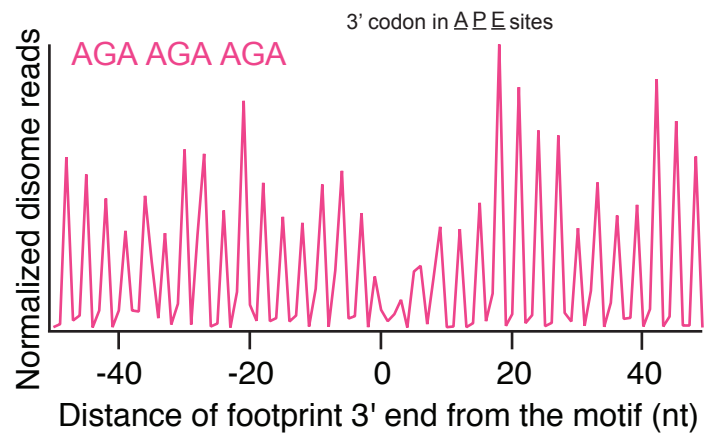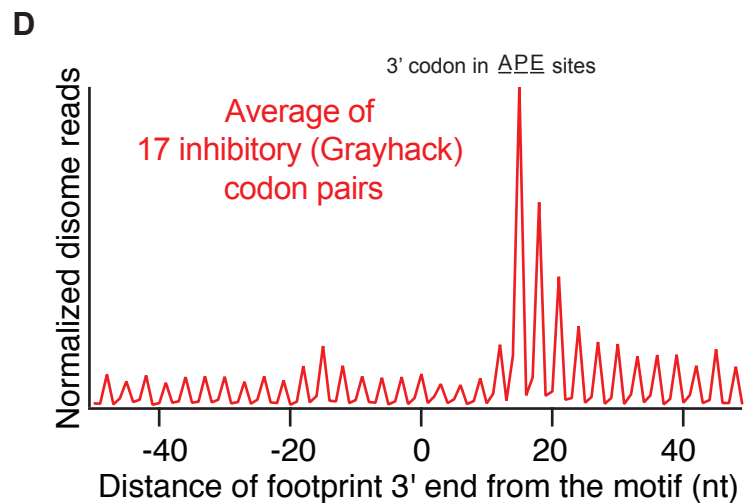

**Figure S3: Identity of codon stretches that are enriched with disomes. Related to Figure 3.**

**A. Top panel:** Plot comparing collision score (disome rpkm/monosome rpkm) with translation efficiency (TE, monosome rpkm/RNA-seq rpkm). Each dot represents the data for one gene with greater than 10 rpkm coverage in monosome profiling, disome profiling, and RNA-seq. The data presented here is the average of two WT biological monosome, disome and RNA-seq replicates. No correlation is observed between TE and collisions.

**Bottom panel:** Schematics showing how translation parameters could affect disome formation. Ribosome loading (TE) can be influenced by translation initiation, elongation and termination rates. Here, we show two different initiation rates that result in low (top) and high (bottom) TE. Rate of initiation refers to all events from 40S recruitment to the first peptidyl-transfer. Regions of slow elongation are indicated in red. We would expect that low TE leads to fewer disomes, since a stalled ribosome is less likely to collide with an upstream ribosome. In contrast, mRNAs with higher TE are expected to be more prone to disome formation. However, no correlation between TE and collisions is observed. Multiple factors that could explain the lack of correlation are indicated (blue): (1) Disome formation may directly inhibit initiation, reducing TE. (2) Slow regions may be disfavored by evolution on high TE mRNAs, reducing disome formation. See also Discussion.

**B.** Average disome rpm corresponding to two (top) and three (bottom) consecutive Lys codons. The reads are normalized to the total rpm within a window  $\pm 50$  nt.

**C.** Average disome rpm corresponding to two (top) and three (bottom) consecutive Arg codons. The reads are normalized to the total rpm within a window  $\pm 50$  nt. Two consecutive CGA codons exhibit the greatest disome occupancy. The number of disome reads mapping to three consecutive Arg codons was only sufficient to generate a plot in the case of AGA.

**D.** Average disome rpm corresponding to 17 inhibitory (Grayhack) codon pairs (CGA-CCG, CGA-GCG, CUC-CCG, CGA-CGA, CGA-AUA, CGA-CUG, CGA-CGG, CUG-CCG, GUA-CGA, CUG-CGA, GUG-CGA, AGG-CGA, AUA-CGA, GUA-CCG, AUA-CGG, CUG-AUA, AGG-CGG). The reads are normalized to the total rpm within a window  $\pm 50$  nt.

For **B-D**, the positions corresponding to where the 3' codon would be for the A, P or E site of the lead ribosome is indicated above the peaks.



**Figure S4: Hel2 stabilizes disomes at various motifs. Related to Figure 4.**

**A.** Boxplots showing the distribution of disome pause scores across all KKK, GGG and PPG motifs in the transcriptome from WT (red) and *hel2* $\Delta$  (black) cells. Pause scores are calculated by dividing the rpm value at the motif by the average rpm of the window  $\pm 50$  nt around the motif. Pause scores that were equal to 0 (no reads at site of interest) were eliminated from the analysis. Biological replicates for each are shown. For all comparisons, the median pause score is significantly greater in WT versus *hel2* $\Delta$  cells. Significance calculation performed on non-logged pause score values by using independent 2-group Mann Whitney U Test for each pair. p-values for each comparison: 2.4e-5 for KKK motif-replicate1, 4.4e-07 for KKK motif-replicate2; 0.0054 for GGG motif-replicate1, 3.6e-5 for GGG motif-replicate2; 0.0015 for PPG motif-replicate1, 0.00073 for PPG motif-replicate2.

**B.** Average disome pause scores of 6267 tripeptide motifs compared between strains. Each point in the graph represents the average score for a particular tripeptide motif. **Top row:** Average pause scores of strong stalling motifs are consistently decreased in *hel2* $\Delta$  cells, as the dots are shifted below the diagonal (shown by red arrow) in both replicates. The reproducibility of the data are shown by comparing biological replicates of each strain. **Middle row:** YCplac33 plasmids expressing WT or mutant *HEL2*, where the native promoter ( $P_{HEL2}$ ) and transcription terminator ( $Ter_{HEL2}$ ), from the *HEL2* ORF are used. *HEL2* expression in *hel2* $\Delta$  cells restores disome levels, as the dots are no longer shifted below the diagonal (compare the first and second graphs). Expression of an inactive Hel2 (third graph) cannot rescue disome levels and mimics the phenotype of *hel2* $\Delta$  cells (fourth graph). **Bottom row:** Disome (left) and trisome (middle) average pause scores from WT and *hel2* $\Delta$  His3<sup>+</sup> cells. Note that in both experiments, dots are shifted below the diagonal. This shows that loss of *HEL2* results in both lower disome and lower trisome accumulation for the strongest pause-inducing motifs. Comparison of WT trisome and WT disome average pause scores (right) show that the values are correlated and, therefore, trisomes are prevalent.

**C.** Average pause scores of the same 6267 tripeptides in **B** are compared between WT and biological replicates of many deletion strains: *slh1* $\Delta$ , *hcr1* $\Delta$ , *rpl11B* $\Delta$  and *not4* $\Delta$ . Only *slh1* $\Delta$  shows slightly similar phenotype to *hel2* $\Delta$ . Each point represents a tripeptide motif.

A

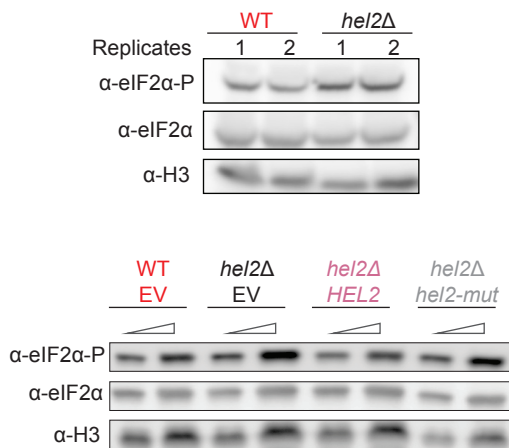

B

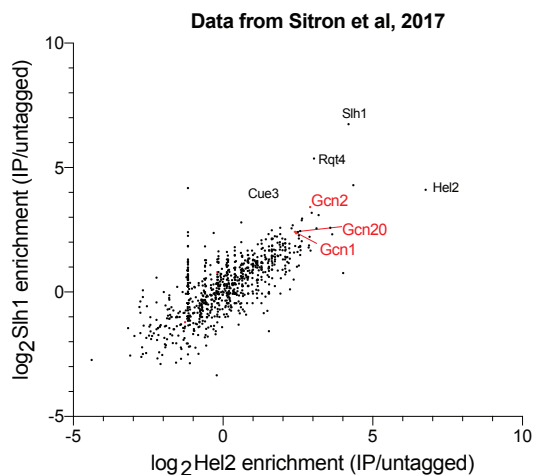

C

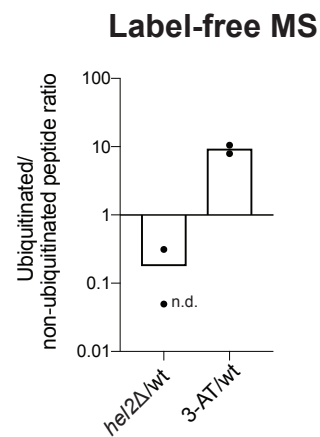

D

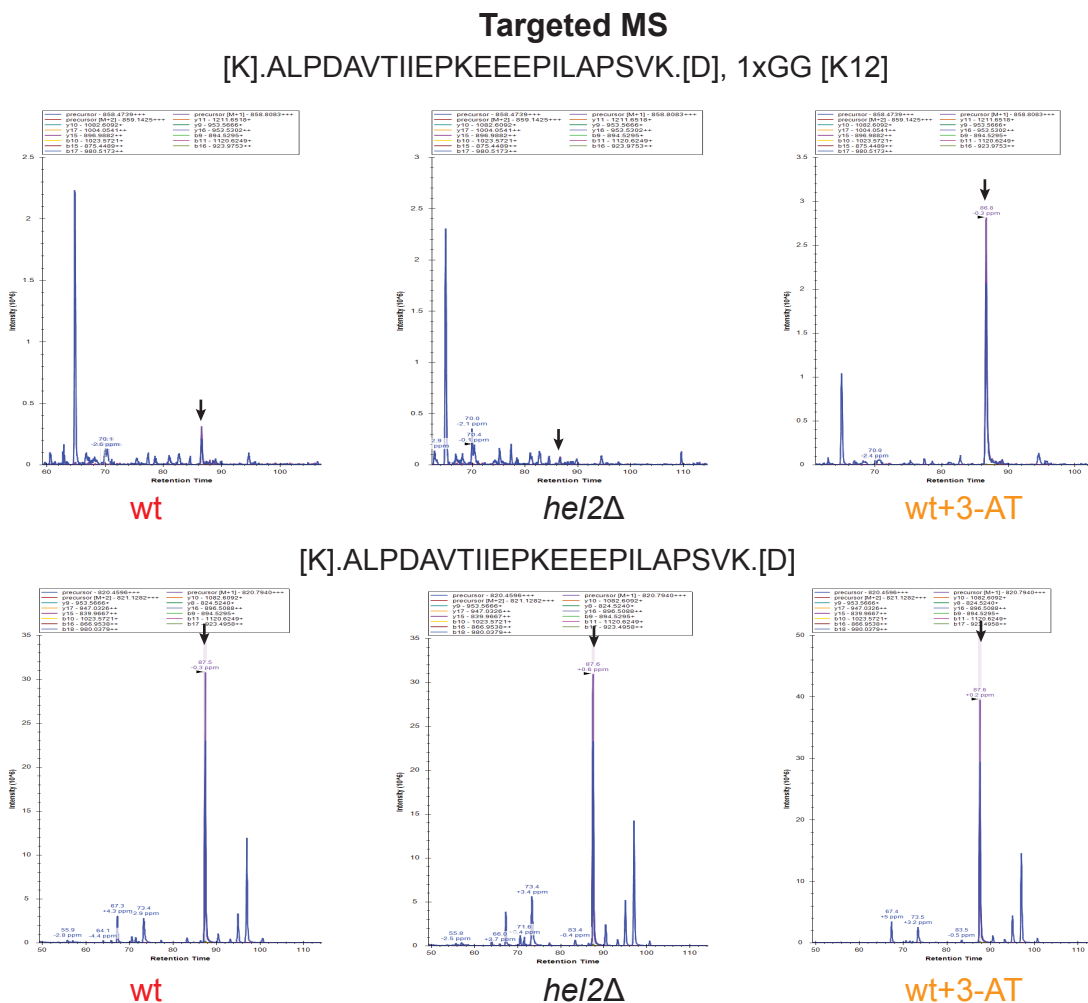

E

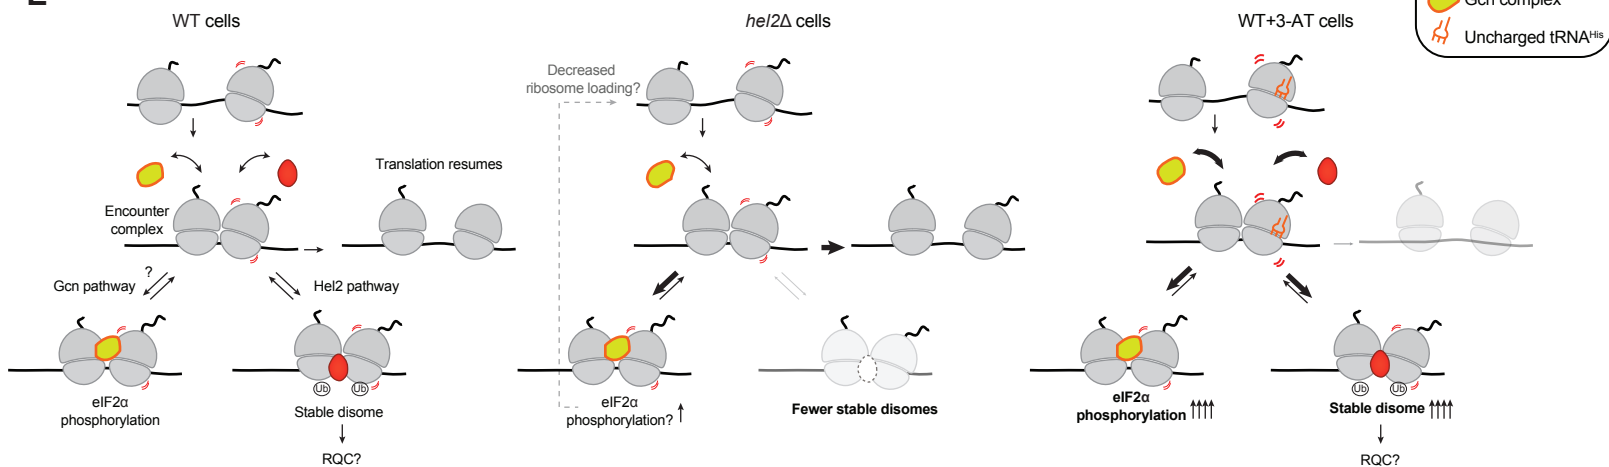

**Figure S5: Connections between Hel2 and Gcn pathways. Related to Figure 5.**

**A. Top panel:** Western blot showing increased eIF2 $\alpha$  phosphorylation in *hel2* $\Delta$  compared to WT cells. Two biological replicates are shown (these are in addition to those shown in 5D). **Bottom panel:** Biological replicate of the western blot shown in Figure 5D. Note that eIF2 $\alpha$  levels do not change in either blot. H3 (histone protein) serves as a loading control.

**B.** Comparison of proteins that were obtained in immunoprecipitation of Slh1 and Hel2. The data were published previously (Sitron et al, 2017). To re-create this plot, as described previously (Sitron et al, 2017), we added +1 to each spectral count value to avoid calculating the log of “0” values. Then we normalized each spectral count to total spectral counts in the respective sample. We averaged the replicates and used this average to obtain the enrichment ratio score shown on the plot. Gcn1, Gcn2 and Gcn20 are highlighted in red. Other RQT proteins, Slh1, Cue3, and Rqt4 (*YKR023W*), are also indicated on the plot.

**C.** Bar graph showing how uS3 ubiquitination on disomes is lowered due to loss of Hel2 but increases upon addition of 3-AT. Data obtained by label-free mass spectrometry (MS). Each dot indicates a technical replicate that is obtained from the same cellular lysate but processed independently through the sucrose gradient and MS procedure. Note that ubiquitinated uS3 was too low to be detected in one of the *hel2* $\Delta$  replicates (indicated as n.d., a value of 0.01 was automatically assigned by the MS software to avoid a “0” value). The levels of other proteins associated with disomes can be found in Supplementary Excel Tables S4 and S5.

**D.** Spectra from targeted MS of uS3 fragments. Sequences used for targeted MS are indicated on top of the spectra. **Top panel** shows the spectra that includes the peptide that is ubiquitinated for WT, *hel2* $\Delta$ , and WT+3-AT samples. The peak corresponding to this fragment is indicated with an arrow. Note that the intensity of this peak is ~7-fold higher in WT+3-AT compared to WT, and ~6-fold lower in *hel2* $\Delta$  sample. As an internal control for protein levels, the **bottom panel** shows that the amount of a non-ubiquitinated uS3 fragment is similar between samples.

**E.** Model for interaction between Gcn and Hel2 pathways. As shown Figure 4D, disomes initially form an “encounter complex” detected by sensors of ribosome collision. **Left scheme:** The Gcn complex and Hel2 both sense encounter complexes and may co-exist on sampled ribosomes. The encounter complex can trigger the Gcn pathway by activating Gcn2 and increasing levels of eIF2 $\alpha$  phosphorylation. If the encounter complex is recognized by Hel2, collisions are stabilized and may then either be targeted to downstream RQC steps or resolve through resumed translation. **Middle scheme:** In the absence of Hel2, encounter complexes are more available to be recognized by the Gcn pathway, leading to increased eIF2 $\alpha$  phosphorylation. Without stabilization by ubiquitin, disomes more frequently resume translation. An alternative model, which posits that ISR activation in the absence of Hel2 reduces ribosome loading on mRNAs and leads to decreased disome formation, is also indicated. **Right scheme:** His starvation induced by 3-AT increases the abundance of encounter complexes at His codons. These complexes are recognized by both Hel2 and Gcn pathways, leading to disome ubiquitination and increased eIF2 $\alpha$  phosphorylation, respectively.

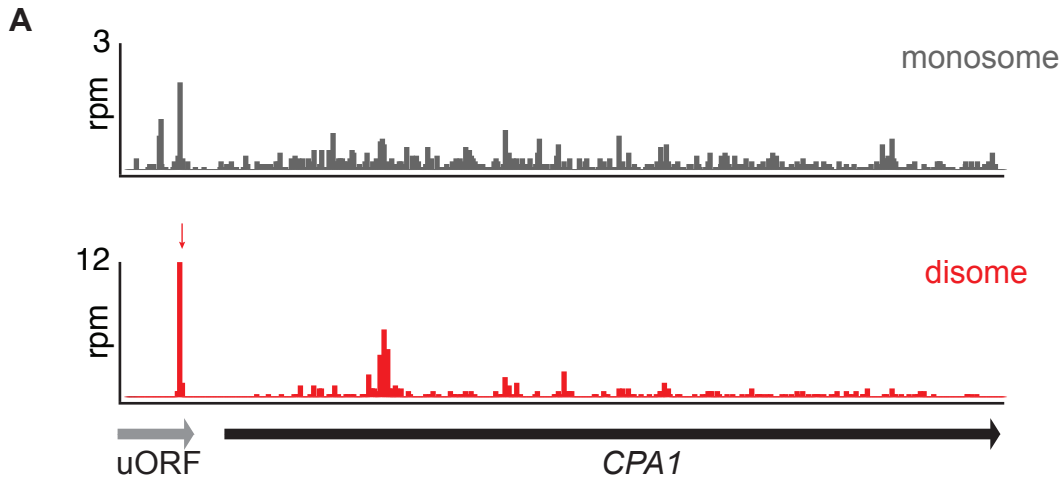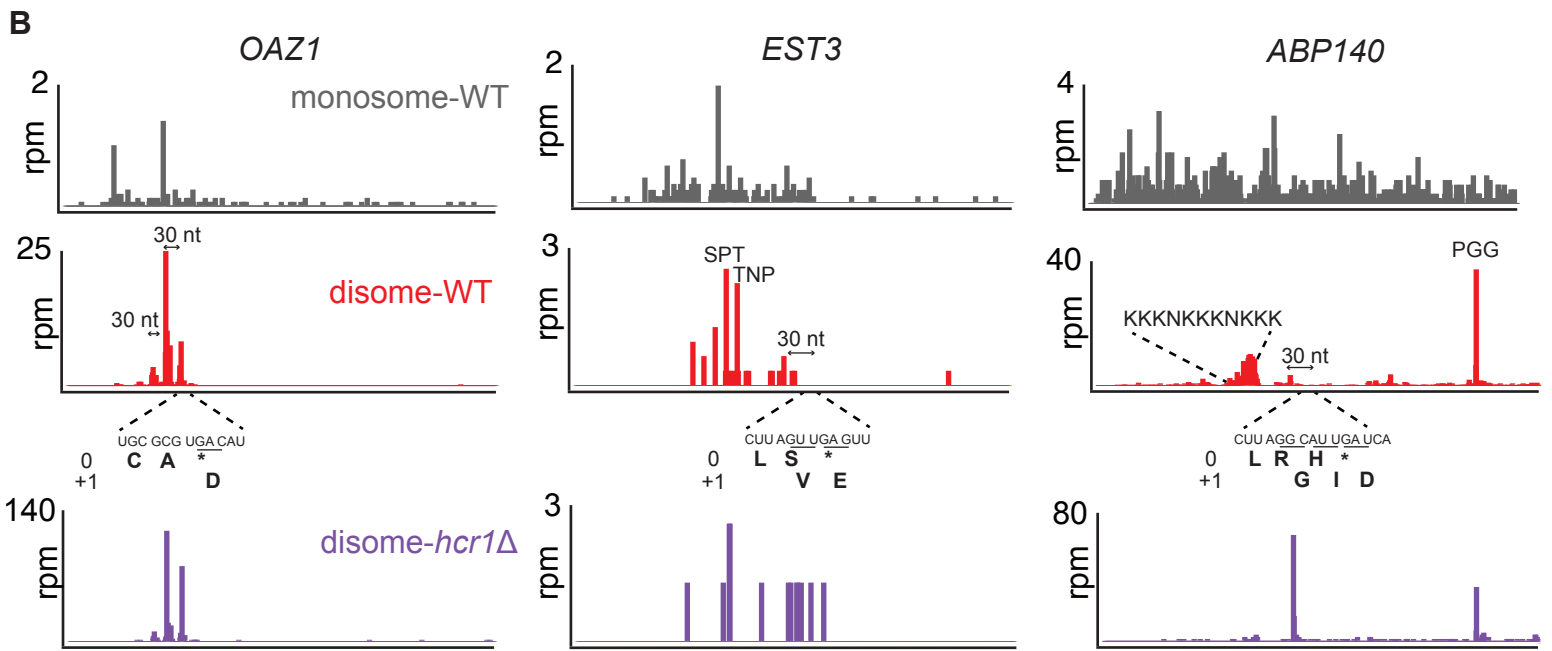

**C** *L-A virus genome*

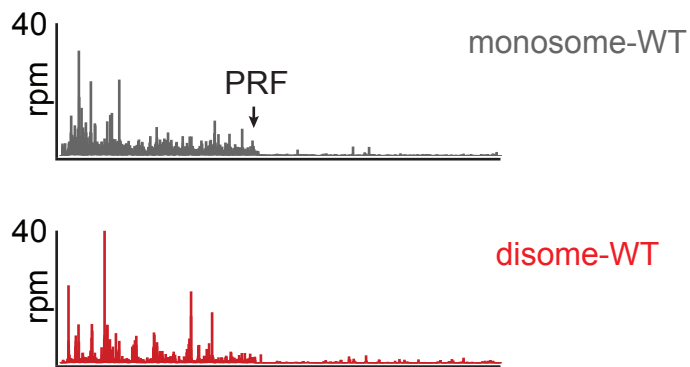

**Figure S6: Disomes may have functional roles in translation. Related to Figure 6.**

**A.** Monosome (gray, top) and disome (red, bottom) footprints that map to the *CPA1* gene. Data are from pooled replicates. A disome forms due to a regulatory stalling event encoded by the *CPA1* upstream ORF (red arrow).

**B.** Monosome (gray, top), disome (red for WT and purple for *hcr1Δ*, bottom) footprints mapping to three cellular +1 programmed frameshifting cases. Data obtained from pooled replicates. The sequence of the frameshifting site is shown for each case and +1 and 0 frame amino acid sequences are indicated. Note that only *OAZ1* has a disome mapping to the frameshifting site, whereas *EST3* and *ABP140* show the disome upstream of the frameshifting region, which could result from queued ribosomes. Sequences that appear to trigger additional disome peaks are indicated above their respective peaks.

**C.** Monosome (gray, top) and disome (red, bottom) profiles of the L-A virus genome. Reads were mapped to the L-A virus genome (NC\_003745.1) using Bowtie 1.1.2. -1 PRF site is indicated with an arrow. Note that a substantial disome peak around -1 PRF site does not exist.



Table S1. Yeast strains used in this study, related to STAR Methods.

| Yeast name                                                                 | Genotype                                                | Source     |
|----------------------------------------------------------------------------|---------------------------------------------------------|------------|
| BY4741 WT                                                                  | <i>MATa his3Δ1 leu2Δ0 met15Δ0 ura3Δ0</i>                | Dharmacon  |
| BY4741 <i>hel2Δ</i>                                                        | <i>MATa his3Δ1 leu2Δ0 met15Δ0 ura3Δ0 hel2::KanMX4</i>   | Dharmacon  |
| BY4741 WT, His3 <sup>+</sup> (For +/- 3-AT disome and trisome experiments) | <i>MATa leu2Δ0 met15Δ0 ura3Δ0</i>                       | This study |
| BY4741 <i>hel2Δ</i> , His3 <sup>+</sup> (For disome/trisome experiments)   | <i>MATa leu2Δ0 met15Δ0 ura3Δ0 hel2::KanMX4</i>          | This study |
| BY4741 <i>not4Δ</i>                                                        | <i>MATa his3Δ1 leu2Δ0 met15Δ0 ura3Δ0 not4::KanMX4</i>   | Dharmacon  |
| BY4741 <i>rpl11BΔ</i>                                                      | <i>MATa his3Δ1 leu2Δ0 met15Δ0 ura3Δ0 rpl11B::KanMX4</i> | Dharmacon  |
| BY4741 <i>slh1Δ</i>                                                        | <i>MATa his3Δ1 leu2Δ0 met15Δ0 ura3Δ0 slh1::KanMX4</i>   | Dharmacon  |
| BY4741 <i>hcr1Δ</i>                                                        | <i>MATa his3Δ1 leu2Δ0 met15Δ0 ura3Δ0 hcr1::KanMX4</i>   | Dharmacon  |

Table S2. Oligonucleotides used in this study. Related to STAR Methods.

| Name                                                                                                     | Sequence (5' to 3')                                                                                                                                          |
|----------------------------------------------------------------------------------------------------------|--------------------------------------------------------------------------------------------------------------------------------------------------------------|
| <b>Primers that were used to construct BY4741 WT His3<sup>+</sup> strain</b>                             |                                                                                                                                                              |
| His3-Fwd                                                                                                 | GAGCAGGCAAGATAAACGAAGGCAAAGATG                                                                                                                               |
| His3-Rev                                                                                                 | GTATATATATCGTATGCTGCAGCTTTAAATAATCG                                                                                                                          |
| <b>Primers that were used to confirm BY4741 WT His3<sup>+</sup> strain for <i>HIS3</i> gene knock-in</b> |                                                                                                                                                              |
| His3-Upstr-Fwd                                                                                           | AGTGCATTGGTGACTTACACATAGA                                                                                                                                    |
| His3-Downstr-Rev                                                                                         | GCTCAGTTCAGCCATAATATGAAAT                                                                                                                                    |
| <b>Primers that were used to generate YCplac33-<i>HEL2</i> plasmid</b>                                   |                                                                                                                                                              |
| hel2-upstr486_Fwd                                                                                        | AACAGCTATGACCATGATTACGCCAAGCTTATGTAGAAGCAAGAGTACAATTCAGG                                                                                                     |
| hel2-downstr256_Rev                                                                                      | CGACGTTGTAAAACGACGGCCAGTGAATTCAGGAACTAATCAATAATTTGACTACTCTT                                                                                                  |
| <b>Site directed mutagenesis primers that were used to generate YCplac33-<i>hel2-mut</i> plasmid</b>     |                                                                                                                                                              |
| hel2_C64AC6_7A_Fwd                                                                                       | AATTGCTGCGCGCAAGTTAACATAC                                                                                                                                    |
| hel2_C64AC6_7A_Rev                                                                                       | ACAGCTAATTCATTTTCTTCATCAGTATCATC                                                                                                                             |
| <b>RNA size selection markers</b>                                                                        |                                                                                                                                                              |
| 25mer                                                                                                    | rArUrGrUrArCrArCrGrGrArGrUrCrGrArGrCrArCrCrGrCrA                                                                                                             |
| 34mer                                                                                                    | rArUrGrUrArCrArCrGrGrArGrUrCrGrArGrCrArCrCrGrCrArArCrGrCrGrArArUrG                                                                                           |
| 40mer                                                                                                    | rArUrGrUrArCrArCrGrGrArGrUrCrGrArGrCrArCrCrGrCrArArCrGrCrGrArArUrGrUrArCrArCrG                                                                               |
| 54mer                                                                                                    | rArUrGrUrArCrArCrGrGrArGrUrCrGrArGrCrArCrCrGrCrArArCrGrCrGrArArUrGrUrArCrArCrGrGrArGrUrCrGrArGrCrArCrCrGrG                                                   |
| 68mer                                                                                                    | rArUrGrUrArCrArCrGrGrArGrUrCrGrArGrCrArCrCrGrCrArArCrGrCrGrArArUrGrUrArCrArCrGrGrArGrUrCrGrArGrCrArCrCrGrCrArArCrGrCrGrArUrGrUrArCrA                         |
| 80mer                                                                                                    | rArUrGrUrArCrArCrGrGrArGrUrCrGrArGrCrArCrCrGrCrArArCrGrCrGrArArUrGrUrArCrArCrGrGrArGrUrCrGrArGrCrArCrCrGrCrArArCrGrCrGrArUrGrUrArCrArCrCrCrGrCrArArCrGrCrGrA |
| <b>rRNA subtraction oligonucleotides</b>                                                                 |                                                                                                                                                              |
| 1b                                                                                                       | /5BioTinTEG/GGTGCACAATCGACCGATC                                                                                                                              |
| 2b                                                                                                       | /5BioTinTEG/GTTTCTTTACTTATTCAATGAAGCGG                                                                                                                       |
| 3b                                                                                                       | /5BioTinTEG/TATAGATGGATACGAATAAGGCGTC                                                                                                                        |
| 4                                                                                                        | /5BioTinTEG/TTGTGGCGTCGCTGAACCATAG                                                                                                                           |
| 5                                                                                                        | /5BioTinTEG/CAGGGGGCATGCCTGTTTGAGCGTCAT                                                                                                                      |
| 6                                                                                                        | /5BioTinTEG/CGGTGCCCGAGTTGTAATTT                                                                                                                             |
| <b>Linker oligonucleotides</b>                                                                           |                                                                                                                                                              |

|                    |                                                                                    |
|--------------------|------------------------------------------------------------------------------------|
| NI-810             | 5'-/5Phos/NNNNNATCGTAGATCGGAAGAGCACACGTCTGAA/3ddC/                                 |
| NI-811             | 5'-/5Phos/NNNNNAGCTAAGATCGGAAGAGCACACGTCTGAA/3ddC/                                 |
| NI-812             | 5'-/5Phos/NNNNNCGTAAAGATCGGAAGAGCACACGTCTGAA/3ddC/                                 |
| NI-813             | 5'-/5Phos/NNNNNCTAGAAGATCGGAAGAGCACACGTCTGAA/3ddC/                                 |
| NI-814             | 5'-/5Phos/NNNNNGATCAAGATCGGAAGAGCACACGTCTGAA/3ddC/                                 |
| NI-815             | 5'-/5Phos/NNNNNGCATAAGATCGGAAGAGCACACGTCTGAA/3ddC/                                 |
| <b>RT primer</b>   |                                                                                    |
| NI-802             | 5'-<br>/5Phos/NNAGATCGGAAGAGCGTCGTGTAGGGAAAGAG/iSp18/GTGACTGGAG<br>TTCAGACGTGTGCTC |
| <b>PCR primers</b> |                                                                                    |
| NI-NI-798          | 5'- AATGATACGGCGACCACCGAGATCTACACTCTTTCCCTACACGACGCTC                              |
| NI-799             | 5'-<br>CAAGCAGAAGACGGCATAACGAGATCGTGATGTGACTGGAGTTCAGACGTGT<br>G                   |

Table S3. Ribosome profiling statistics. Related to STAR Methods.

| Sample name | Description                | Data type  | Reads with linker | Not aligned to non-coding RNA | Reads without PCR duplicates | Aligned to coding regions and splice junctions |
|-------------|----------------------------|------------|-------------------|-------------------------------|------------------------------|------------------------------------------------|
| SM015F      | WT_rep1                    | Ribo-seq   | 32,634,770        | 9,956,385                     | 8,022,682                    | 6,435,058                                      |
| SM016F      | <i>hel2Δ</i> _rep1         | Ribo-seq   | 59,462,147        | 15,263,501                    | 12,283,248                   | 10,085,580                                     |
| SM023F      | WT_rep2                    | Ribo-seq   | 35,194,988        | 12,817,968                    | 10,280,446                   | 8,486,785                                      |
| SM024F      | <i>hel2Δ</i> _rep2         | Ribo-seq   | 42,907,002        | 13,731,922                    | 11,032,308                   | 9,122,829                                      |
| SM015Fd     | WT_rep1                    | Disome-seq | 441,031,439       | 33,875,061                    | 18,686,469                   | 3,135,609                                      |
| SM016Fd     | <i>hel2Δ</i> _rep1         | Disome-seq | 211,362,149       | 13,897,689                    | 8,582,714                    | 1,677,549                                      |
| SM023Fd     | WT_rep2                    | Disome-seq | 67,913,789        | 6,168,719                     | 3,482,544                    | 859,613                                        |
| SM024Fd     | <i>hel2Δ</i> _rep2         | Disome-seq | 82,170,337        | 10,524,816                    | 7,606,696                    | 3,926,150                                      |
| SM025Fd     | <i>slh1Δ</i> _rep1         | Disome-seq | 109,879,478       | 10,846,503                    | 6,539,078                    | 2,337,432                                      |
| SM029Fd     | <i>slh1Δ</i> _rep2         | Disome-seq | 114,705,670       | 2,931,501                     | 2,487,287                    | 1,139,848                                      |
| SM026Fd     | WT_rep3                    | Disome-seq | 184,934,998       | 5,440,085                     | 4,579,797                    | 2,134,850                                      |
| SM030Fd     | <i>not4Δ</i> _rep1         | Disome-seq | 150,841,702       | 5,289,408                     | 4,376,566                    | 2,128,395                                      |
| SM031Fd     | <i>not4Δ</i> _rep2         | Disome-seq | 119,507,286       | 3,991,422                     | 3,402,667                    | 1,464,357                                      |
| SM032Fd     | <i>hcr1Δ</i> _rep1         | Disome-seq | 113,682,835       | 2,127,465                     | 1,893,959                    | 325,900                                        |
| SM033Fd     | <i>hcr1Δ</i> _rep2         | Disome-seq | 128,983,396       | 2,399,097                     | 2,157,956                    | 444,663                                        |
| SM034Fd     | <i>rpl11BΔ</i> _rep1       | Disome-seq | 190,193,094       | 4,434,485                     | 3,888,816                    | 842,846                                        |
| SM035Fd     | <i>rpl11BΔ</i> _rep2       | Disome-seq | 66,233,613        | 1,255,595                     | 1,142,679                    | 258,376                                        |
| SM036Fd     | WT_His3 <sup>+</sup>       | Disome-seq | 88,727,575        | 1,559,864                     | 1,131,322                    | 111,567                                        |
| SM037Fd     | WT_His3 <sup>+</sup> _3-AT | Disome-seq | 77,677,380        | 1,997,656                     | 1,618,405                    | 561,333                                        |

|         |                                                               |             |             |            |           |            |
|---------|---------------------------------------------------------------|-------------|-------------|------------|-----------|------------|
| SM038Fd | <i>hel2Δ</i> _His3 <sup>+</sup>                               | Disome-seq  | 119,603,326 | 2,586,829  | 1,864,214 | 260,642    |
| SM040Fd | WT_ANS                                                        | Disome-seq  | 138,642,768 | 5,335,853  | 4,285,855 | 2,150,720  |
| SM042Fd | WT<br>YCplac33                                                | Disome-seq  | 47,733,375  | 25,415,832 | 5,956,757 | 3,967,513  |
| SM043Fd | <i>hel2Δ</i><br>YCplac33                                      | Disome-seq  | 43,071,227  | 27,558,579 | 5,156,939 | 3,450,261  |
| SM044Fd | <i>hel2Δ</i><br>YCplac33-<br><i>HEL2</i>                      | Disome-seq  | 44,030,912  | 19,678,977 | 4,620,671 | 2,732,398  |
| SM045Fd | <i>hel2Δ</i><br>YCplac33-<br><i>hel2</i> -<br><i>C64AC67A</i> | Disome-seq  | 40,531,321  | 21,847,970 | 4,928,916 | 3,414,472  |
| SM036Ft | WT_His3 <sup>+</sup>                                          | Trisome-seq | 68,435,251  | 20,343,248 | 2,426,221 | 540,369    |
| SM038Ft | <i>hel2Δ</i> _His3 <sup>+</sup>                               | Trisome-seq | 69,672,848  | 35,008,524 | 4,334,680 | 2,150,045  |
| SM015M  | WT_rep1                                                       | RNA-seq     | 28,248,177  | 21,702,935 | N/A       | 15,411,776 |
| SM016M  | <i>hel2Δ</i> _rep1                                            | RNA-seq     | 60,557,306  | 43,444,522 | N/A       | 27,241,161 |
| SM023M  | WT_rep2                                                       | RNA-seq     | 39,286,158  | 29,116,230 | N/A       | 17,283,716 |
| SM024M  | <i>hel2Δ</i> _rep2                                            | RNA-seq     | 51,675,601  | 35,070,369 | N/A       | 16,568,700 |
